# Supplementary material for: Ecotoxicological Evaluation of Bisphenol A and Alternatives: A Comprehensive In Silico Modelling Approach
Source: MDPI journal article supplement (doi:10.3390/jox13040046), 2023-11-23
Supplement: s1 [file s1]

Supplementary Materials for

# Ecotoxicological Evaluation of Bisphenol A and alternatives: A Comprehensive in silico Modelling Approach

Liadys Mora Lagares<sup>1, \*</sup>, and Marjan Vračko<sup>1</sup>

<sup>1</sup> Theory Department, Laboratory for Cheminformatics, National Institute of Chemistry, 1000 Ljubljana, Slovenia; marjan.vracko@ki.si

\* Correspondence: liadys.moralagares@ki.si (L.M.L.) Tel.: +386-1-4760-439

**Table S1.** Dataset of bisphenol alternatives utilized in the study.

| ID | EC/List No | CAS         | Chemical Name                                                                                                                                             | Common name                                               |
|----|------------|-------------|-----------------------------------------------------------------------------------------------------------------------------------------------------------|-----------------------------------------------------------|
| 1  | 201-240-0  | 79-97-0     | 4,4'-isopropylidenedi-o-cresol                                                                                                                            | 3,3'-Dimethylbisphenol A; Dicresylolpropane, BPC          |
| 2  | 201-245-8  | 80-05-7     | 4,4'-isopropylidenediphenol                                                                                                                               | BPA, bisphenol A                                          |
| 3  | 204-137-9  | 116-37-0    | 1,1'-isopropylidenebis(p-phenyleneoxy)dipropyl-2-ol                                                                                                       | Bisphenol A bis(2-hydroxypropyl) ether; BPA 2 PO          |
| 4  | 212-985-6  | 901-44-0    | 2,2'-isopropylidenebis(p-phenyleneoxy)diethanol                                                                                                           | Bisphenol A bis(2-hydroxyethyl) ether; BPA 2 EO           |
| 5  | 214-590-4  | 1156-51-0   | 4,4'-isopropylidenediphenyl dicyanate                                                                                                                     | Bisphenol A cyanate ester; BADCy                          |
| 6  | 216-823-5  | 1675-54-3   | 2,2'-[(1-methylethylidene)bis(4,1-phenyleneoxymethylene)]bisoxirane                                                                                       | BISPHENOL A DIGLYCIDYL ETHER; BADGE                       |
| 7  | 217-121-1  | 1745-89-7   | 4,4'-isopropylidenebis[2-allylphenol]                                                                                                                     | Allyl bisphenol A; DAB                                    |
| 8  | 227-033-5  | 5613-46-7   | 4,4'-isopropylidenedi-2,6-xylol                                                                                                                           | Tetramethylbisphenol A; TMBPA                             |
| 9  | 235-985-8  | 13080-86-9  | 4,4'-[isopropylidenebis(4,1-phenyleneoxy)]dianiline                                                                                                       | BAPP                                                      |
| 10 | 242-895-2  | 19224-29-4  | 2,2'-[(1-methylethylidene)bis(4,1-phenyleneoxy)]bisethyl diacetate                                                                                        | SCHEMBL11889494, EINECS 242-895-2                         |
| 11 | 248-607-1  | 27689-12-9  | (1-methylethylidene)bis(4,1-phenyleneoxy-3,1-propanediyl) bis-methacrylate                                                                                | 2,2-bis-(4-(3-methacryloxypropoxy)phenyl)propane; BIS-PMA |
| 12 | 253-781-7  | 38103-06-9  | 4,4'-[(isopropylidene)bis(p-phenyleneoxy)]diphthalic dianhydride                                                                                          | 4,4'-Bisphenol A dianhydride; BPA-DA                      |
| 13 | 425-220-8  | 5945-33-5   | (1-methylethylidene)di-4,1-phenylene tetraphenyl diphosphate                                                                                              | Bisphenol A bis(diphenyl phosphate); BPA-DP               |
| 14 | 432-380-2  | 147504-92-5 | 4,6-bis[2-(4-hydroxyphenyl)isopropylidene]resorcinol                                                                                                      | HBPX-1                                                    |
| 15 | 434-000-0  | n/a         | 3-{2-[2,4-dihydroxy-5-(2-phenylpropan-2-yl)phenyl]propan-2-yl}phenyl 6-(-lambda5-diazynylidene)-5-methylidene-4a,5,6,8a-tetrahydronaphthalene-1-sulfonate | PURAM                                                     |

|    |           |             |                                                                                      |                                                              |
|----|-----------|-------------|--------------------------------------------------------------------------------------|--------------------------------------------------------------|
| 16 | 216-367-7 | 1565-94-2   | (1-methylethylidene)bis[4,1-phenyleneoxy(2-hydroxy-3,1-propanediyl)] bismethacrylate | Silux; Bisphenol A glycidylmethacrylate                      |
| 17 | 223-123-3 | 3739-67-1   | 4,4'-isopropylidenebis[(allyloxy)benzene]                                            | Bisphenol A bisallyl ether; 2,2-Bis(4-allyloxyphenyl)propane |
| 18 | 225-144-3 | 4687-94-9   | (1-methylethylidene)bis[4,1-phenyleneoxy(2-hydroxy-3,1-propanediyl)] diacrylate      | Bisphenol a diglycidyl ether diacrylate                      |
| 19 | 246-263-7 | 24448-20-2  | (1-methylethylidene)bis(4,1-phenyleneoxy-2,1-ethanediyl) bismethacrylate             | Bisphenol A bis(2-hydroxyethyl ether) dimethacrylate         |
| 20 | 605-281-9 | 16224-36-5  | 4,4'-(1-Methylethyliden)-bis-[2,6-bis-(dimethylaminomethyl)-phenol]                  | Tetrakis(dimethylaminomethyl)bisphenol A                     |
| 21 | 605-913-3 | 181028-79-5 | [4-[2-(4-phosphonooxyphenyl)propan-2-yl]phenyl] dihydrogen phosphate                 | Bisphenol A diphosphate                                      |
| 22 | 613-584-2 | 64401-02-1  | 2,2-Bis[4-(2-Acryloxyethoxy)phenyl]propane                                           | Ethoxylated (2) bisphenol A diacrylate                       |
| 23 | 678-196-8 | 127-54-8    | 2,2-Bis(4-hydroxy-3-isopropylphenyl)propane                                          | Bisphenol G; BPG                                             |
| 24 | 678-197-3 | 24038-68-4  | 2,2-Bis(2-hydroxy-5-biphenyl)propane                                                 | Bisphenol PH; BPPH                                           |
| 25 | 201-250-5 | 80-09-1     | 4,4'-sulphonyldiphenol                                                               | BPS                                                          |
| 26 | 235-986-3 | 13080-89-2  | 4,4'-[sulphonylbis(4,1-phenyleneoxy)]dianiline                                       | n/a                                                          |
| 27 | 263-920-3 | 63134-33-8  | p-[p-benzyloxyphenyl]sulphonylphenol                                                 | BPS-MPE                                                      |
| 28 | 405-520-5 | 95235-30-6  | 4-(4-isopropoxyphenyl)sulphonylphenol                                                | D8 (D88); D8(HPS); BPS-monoP                                 |
| 29 | 411-570-9 | 41481-66-7  | 2,2'-diallyl-4,4'-sulfonyldiphenol                                                   | TG-SB, TG-SH, TG-SH(H)                                       |
| 30 | 479-880-7 | 97042-18-7  | 4-(4-Allyloxy-benzenesulfonyl)phenol                                                 | BPS-MAE                                                      |
| 31 | 204-279-1 | 118-82-1    | 2,2',6,6'-tetra-tert-butyl-4,4'-methylenediphenol                                    | TBMD; 4,4'-Methylenebis(2,6-DI-tert-butylphenol)             |
| 32 | 210-658-2 | 620-92-8    | 4,4'-methylenediphenol                                                               | BPF                                                          |
| 33 | 218-257-4 | 2095-03-6   | 2,2'-[methylenebis(p-phenyleneoxymethylene)]bisoxirane                               | Bisphenol F diglycidyl ether; Bis(4-glycidyoxyphenyl)methane |
| 34 | 226-378-9 | 5384-21-4   | 4,4'-methylenedi-2,6-xyleneol                                                        | Tetramethyl Bisphenol F                                      |
| 35 | 405-790-4 | 101657-77-6 | 4,4'-methylenebis(2,6-dimethylphenylcyanate)                                         | n/a                                                          |

|     |           |              |                                                                                                            |                                                                |
|-----|-----------|--------------|------------------------------------------------------------------------------------------------------------|----------------------------------------------------------------|
| 36  | 439-910-1 | 93705-66-9   | 2-[[4-[[3,5-dimethyl-4-(oxiran-2-ylmethoxy)phenyl]methyl]-2,6-dimethylphenoxy]methyl]oxirane               | YSLV-80XY                                                      |
| 37  | 908-912-9 | 1333-16-0    | 2-[(2-hydroxyphenyl)methyl]phenol                                                                          | 2,2'-Bisphenol F                                               |
| 38  | 433-130-5 | 1571-75-1    | 4-[1-(4-hydroxyphenyl)-1-phenylethyl]phenol                                                                | Bisphenol AP; BPAP                                             |
| 39  | 811-683-7 | 1799707-26-8 | 4,4'-(1-phenylethane-1,1-diyl)bis(heptyloxybenzene)                                                        | n/a                                                            |
| 40  | 201-025-1 | 77-40-7      | 4-[2-(4-hydroxyphenyl)butan-2-yl]phenol                                                                    | Bisphenol B; BPB                                               |
| 41  | 679-999-6 | 1844-01-5    | 4,4'-Dihydroxytetraphenylmethane                                                                           | BPBP                                                           |
| 42  | 238-940-0 | 14868-03-2   | 4-[2,2-dichloro-1-(4-hydroxyphenyl)ethenyl]phenol                                                          | Bisphenol C; BPC2 (BPC12)                                      |
| 43* | 945-909-1 | 69415-01-6   | bis(2-[[4-(2,2-dichloro-1-{4-[(oxiran-2-yl)methoxy]phenyl]ethylphenoxy]methyl]oxirane)                     | 1,1-Bis(p-hydroxyphenyl)-2,2-dichloroethylene diglycidyl ether |
| 44  | 627-637-2 | 2081-08-5    | 4-[1-(4-hydroxyphenyl)ethyl]phenol                                                                         | Bisphenol E; BPE                                               |
| 45  | 405-740-1 | 47073-92-7   | 4,4'-ethylidenediphenyl dicyanate                                                                          | 1,1-Bis(4-cyanatophenyl)ethane                                 |
| 46  | 404-470-1 | n/a          | 2-[[4-(9-{4-[(oxiran-2-yl)methoxy]phenyl}-9H-fluoren-9-yl)phenoxy]methyl]oxirane                           | EPIKOTE 1079                                                   |
| 47  | 406-950-6 | 3236-71-3    | 9,9-bis(4-hydroxyphenyl)fluorene                                                                           | BPFL; Fluorene-9-bisphenol                                     |
| 48  | 428-970-4 | 13595-25-0   | 4,4'-(1,3-phenylene-bis(1-methylethylidene))bis-pheno                                                      | Bisphenol M; BPM                                               |
| 49  | 606-820-0 | 2167-51-3    | 4,4'-(1,4-Phenylenediisopropylidene)bisphenol                                                              | Bisphenol P; BPP                                               |
| 50  | 404-140-7 | 129188-99-4  | 1,1-Bis(4-hydroxyphenyl)-3,3,5-trimethylcyclohexane                                                        | BISPHENOL TMC; BP-TMC                                          |
| 51  | 212-677-1 | 843-55-0     | 4,4'-cyclohexylidenebisphenol                                                                              | Bisphenol Z; BPZ                                               |
| 52  | 219-110-7 | 2362-14-3    | Phenol, 4,4'-cyclohexylidenebis[2-methyl-                                                                  | 4,4'-cyclohexylidenedi-o-cremol                                |
| 53  | 810-464-3 | 13446-84-9   | 2,2'-[cyclohexane-1,1-diylbis(4,1-phenyleneoxymethylene)]dioxirane                                         | 1,1-Bis[4-(glycidyloxy)phenyl]cyclohexane                      |
| 54  | 216-036-7 | 1478-61-1    | 4,4'-[2,2,2-trifluoro-1-(trifluoromethyl)ethylidene]diphenol                                               | Bisphenol AF; BPAF                                             |
| 55* | 278-305-5 | 75768-65-9   | benzyltriphenylphosphonium,salt with 4,4'-[2,2,2-trifluoro-1-(trifluoromethyl)ethylidene]bis[phenol] (1:1) | BPAF-salt                                                      |
| 56  | 425-060-9 | n/a          | disodium 4-[1,1,1,3,3,3-hexafluoro-2-(4-oxidophenyl)propan-2-yl]benzen-1-olate                             | T-6627                                                         |

|     |           |             |                                                                                                               |                                                               |
|-----|-----------|-------------|---------------------------------------------------------------------------------------------------------------|---------------------------------------------------------------|
| 57* | 468-740-0 | n/a         | Tributyl-2-methoxypropylphosphonium salt with 4,4'-[2,2,2-trifluoro-1-(trifluoromethyl)ethylidene]bis[phenol] | BPAF-salt                                                     |
| 58  | 469-080-6 | 1478-61-1   | 4-[1,1,1,3,3,3-hexafluoro-2-(4-hydroxyphenyl)propan-2-yl]phenol                                               | BPAF-salt                                                     |
| 59* | 479-100-5 | 577705-90-9 | benzyl(diethylamino)diphenylphosphonium 4-[1,1,1,3,3,3-hexafluoro-2-(4-hydroxyphenyl)propan-2-yl]phenolate    | BPAF-salt                                                     |
| 60  | 201-618-5 | 85-60-9     | 6,6'-di-tert-butyl-4,4'-butylidenedi-m-cresol                                                                 | Santowhite                                                    |
| 61  | 210-039-7 | 603-41-8    | p,p'-(2-pyridylmethylene)bisphenol                                                                            | DDPM                                                          |
| 62  | 217-420-7 | 1843-03-4   | 4,4',4''-(1-methylpropanyl-3-ylidene)tris[6-tert-butyl-m-cresol]                                              | Topanol CA                                                    |
| 63  | 255-002-6 | 40615-36-9  | 1,1'-(chlorophenylmethylene)bis[4-methoxybenzene]                                                             | DMT-Cl                                                        |
| 64  | 255-003-1 | 40615-39-2  | 5'-O-(p,p'-dimethoxytrityl)thymidine                                                                          | DMT-T                                                         |
| 65  | 401-720-1 | n/a         | 2,2-bis(4'-hydroxyphenyl)-4-methylpentane                                                                     | n/a                                                           |
| 66  | 405-800-7 | 27955-94-8  | 4,4',4''-(ethan-1,1,1-triyl)triphenol                                                                         | n/a                                                           |
| 67  | 433-980-7 | n/a         | 4-[1,3,5-tris(4-hydroxyphenyl)pentan-3-yl]phenol                                                              | CHEMICAL CODE NO 1592                                         |
| 68  | 610-104-3 | 43100-47-6  | 3-phenyl-5-(1,1,1-trifluoro-2-{6-hydroxy-5-phenyl-[1,1'-biphenyl]-3-yl}propan-2-yl)-[1,1'-biphenyl]-2-ol      | n/a                                                           |
| 69  | 680-046-1 | 74462-02-5  | 4,4'-(2-ethylhexane-1,1-diyl)diphenol                                                                         | BisP-IOTD                                                     |
| 70  | 201-236-9 | 79-94-7     | 2,6-dibromo-4-[2-(3,5-dibromo-4-hydroxyphenyl)propan-2-yl]phenol                                              | Tetrabromobisphenol A; TBBPA                                  |
| 71  | 221-346-0 | 3072-84-2   | 2-[[2,6-dibromo-4-[2-[3,5-dibromo-4-(oxiran-2-ylmethoxy)phenyl]propan-2-yl]phenoxy]methyl]oxirane             | Tetrabromobisphenol A diglycidyl ether; TBBPA-bGE             |
| 72  | 244-617-5 | 21850-44-2  | 1,3-dibromo-5-[2-[3,5-dibromo-4-(2,3-dibromopropoxy)phenyl]propan-2-yl]-2-(2,3-dibromopropoxy)benzene         | Tetrabromobisphenol A bis(dibromopropyl ether); TBBPA-bDiBPrE |

|    |           |            |                                                                                       |                                                 |
|----|-----------|------------|---------------------------------------------------------------------------------------|-------------------------------------------------|
| 73 | 246-850-8 | 25327-89-3 | 1,3-dibromo-5-[2-(3,5-dibromo-4-prop-2-enoxyphenyl)propan-2-yl]-2-prop-2-enoxybenzene | Tetrabromobisphenol A diallyl ether; TBBPA-bAE  |
| 74 | 253-693-9 | 37853-61-5 | 1,3-dibromo-5-[2-(3,5-dibromo-4-methoxyphenyl)propan-2-yl]-2-methoxybenzene           | Tetrabromobisphenol A dimethyl ether; TBBPA-bME |
| 75 | 306-832-3 | 97416-84-7 | 1,1'-(Isopropylidene)bis(3,5-dibromo-4-(2,3-dibromo-2-methylpropoxy)benzene)          | n/a                                             |
| 76 | 436-220-2 | n/a        | 2,2-bis(3,5-dibromo-4-(3-acryloyloxy-2-hydroxypropoxy)phenyl)propane                  | n/a                                             |

\* Compounds with disconnected structure.
